# Supplementary material
Source: Research Square preprint supplement (doi:10.21203/rs.3.rs-7101426/v1)
Supplement: Supplementary file 1 [file 2875dc5284727fe540ca7b17.docx]

# **Supplementary information**

## **Supplementary Table S1: Demographic Characteristics of the Study Population, by Study Group**

| **Variable** | **Group** | **Justified Visits**  **n = 1,438,283** | **Non-Justified Visits**  **n = 1,404,907** | **Total**  **n = 2,843,190** | **p-value** |
| --- | --- | --- | --- | --- | --- |
| **Age,**  **Years** | >1 | 25,489 )1.8%) | 74,456 (5.3%) | 99,945 (3.5%) | <0.001 |
| 1–4 | 93,836 (6.5%) | 169,450 (12.1%) | 263,286 (9.3%) |
| 5–9 | 73,608 (5.1%) | 94,218 (6.7%) | 167,826 (5.9%) |
| 10–14 | 64,295 (4.5%) | 82,769 (5.9%) | 147,064 (5.2%) |
| 15–19 | 103,673 (7.2%) | 104,496 (7.4%) | 208,169 (7.3%) |
| 20–24 | 112,569 (7.8%) | 116,982 (8.3%) | 229,551 (8.1%) |
| 25–29 | 87,535 (6.1%) | 100,187 (7.1%) | 187,722 (6.6%) |
| 30–34 | 83,052 (5.8%) | 89,510 (6.4%) | 172,562 (6.1%) |
| 35–39 | 81,784 (5.7%) | 80,189 (5.7%) | 161,973 (5.7%) |
| 40–44 | 82,722 5.8%) | 72,788 (5.2%) | 155,510 (5.5%) |
| 45–49 | 79,933 (5.6%) | 66,160 (4.7%) | 146,093 (5.1%) |
| 50–54 | 74,267 (5.2%) | 57,805 (4.1%) | 132,072 (4.6%) |
| 55–59 | 73,803 (5.1%) | 54,805 (3.9%) | 128,608 (4.5%) |
| 60–64 | 77,929 (5.4%) | 53,603 (3.8%) | 131,532 (4.6%) |
| 65–69 | 79,818 (5.5%) | 51,060 (3.6%) | 130,878 (4.6%) |
| 70–74 | 76,521 (5.3%) | 45,469 (3.2%) | 121,990 (4.3%) |
| 75–79 | 56,950 (4.0%) | 32,709 (2.3%) | 89,659 (3.2%) |
| 80–84 | 53,040 (3.7%) | 28,793 (2.0%) | 81,833 (2.9%) |
| ≥85 | 57,398 (4.0%) | 29,431 (2.1%) | 86,829 (3.1%) |
| **Gender** | Male | 782,038 (54.4%) | 751,272 (53.9%) | 1,533,310 (53.9%) | <0.001 |
| **Population Sector** | Jewish | 988,826 (68.8%) | 995,609 (70.9%) | 1,984,435 (69.8%) | <0.001 |
| Arabs / Bedouins | 226,140 (15.7%) | 236,927 (16.9%) | 463,067 (16.3%) |
| Other / Unknown | 223,317 (15.5%) | 172,371 (12.3%) | 395,688 (13.9%) |
| **Distance to Hospital,**  **km** | <10 | 706,725 (49.1%) | 696,769 (49.6%) | 1,403,494 (49.4%) | <0.001 |
| 11–20 | 307,006 (21.3%) | 292,285 (20.8%) | 59,9291 (21.1%) |
| 21–30 | 145,923 (10.1%) | 144,942 (10.3%) | 290,865 (10.2%) |
| 31–40 | 73,834 (5.1%) | 73,801 (5.3%) | 147,635 (5.2%) |
| >40 | 204,795 (14.2%) | 197,110 (14.0%) | 401,905 (14.1%) |

**Table S1.** Demographic characteristics of the study population, stratified by justification of emergency department (ED) visits. Non-justified visits accounted for 49.4% of all ED visits. These visits were significantly more frequent among younger age groups (especially ages 0–14), females, and individuals residing at a moderate distance from the hospital (11–20 km). The columns show the number and percentage of visits in each category. P-values indicate the statistical significance of the observed differences.

## **Supplementary Table S2: Visit Characteristics of the Study Population, by Study Group**

| **Variable** | **Group** | **Justified Visits**  **n = 1,438,283** | **Non-Justified Visits**  **n = 1,404,907** | **Total**  **n = 2,843,190** | **p-value** |
| --- | --- | --- | --- | --- | --- |
| **Referral Source** | Ambulatory Healthcare Provider | 17,349 (1.2%) | 13,486 (1.0 %) | 30,835 (1.1%) | <0.001 |
| Nurse / Educational Institution | 91,905 (6.4%) | 104,882 (7.5%) | 196,787 (6.9%) |
| Hospital | 55,172 (3.8%) | 51,689 (3.7%) | 106,861 (3.8%) |
| Ambulance | 113,680 (7.9%) | 77,936 (5.5%) | 191,616 (6.7%) |
| Mental Health Services | 4,822 (0.3%) | 224 (0.0%) | 5,046 (0.2%) |
| Employer | 6,658 (0.5%) | 8,633 (0.6%) | 15,291 (0.5%) |
| Geriatric Institution | 11,087 (0.8%) | 6,752 (0.5%) | 17,839 (0.6%) |
| Urgent Care Center | 3,976 (0.3%) | 1,794 (0.1%) | 5,770 (0.2%) |
| Health Maintenance Organization (HMO) | 707,590 (49.2%) | 714,036 (50.8%) | 1,421,626 (50%) |
| Self-Referral | 361,074 (25.1%) | 410,650 (29.2%) | 771,724 (27.1%) |
| Police | 1,491 (0.1%) | 2,711 (0.2%) | 4,202 (0.1%) |
| Unknown | 14,021 (1.0%) | 12,114 (0.9%) | 26,135 (0.9%) |
| **Referral Status** | Referred Visit | 1,074,025 (74.7%) | 988,811 (70.4%) | 2,062,836 (72.6%) | <0.001 |
| Self-Referral | 361,082 (25.1%) | 410,652 (29.2%) | 771,734 (27.1%) |
| Unknown | 3,176 (0.2%) | 5,444 (0.4%) | 8,620 (0.3%) |
| **Time of Admission** | 08:00–12:00 | 282,299 (19.7%) | 266,585 (19.0%) | 548,884 (19.3%) | <0.001 |
| 12:00–16:00 | 373,234 (25.9%) | 344,414 (24.5%) | 717,648 (25.2%) |
| 16:00–19:00 | 226,468 (15.7%) | 218,864 (15.6%) | 445,332 (15.7%) |
| 19:00–23:00 | 315,321 (21.9%) | 323,004 (23.0%) | 638,325 (22.5%) |
| 23:00–08:00 | 240,961 (16.8%) | 252,040 (17.9%) | 493,001 (17.3%) |
| **Day of Week** | Weekdays (Sunday– Thursday) | 987,266 (68.6%) | 961,340 (68.4%) | 1,948,606 (68.5%) |  |
| Friday or Holiday Evening | 221,711 (15.5%) | 217,846 (15.5%) | 439,557 (15.5%) | 0.0069 |
| Saturday or Holiday | 229,306 (15.9%) | 225,721 (16.1%) | 455,027 (16%) | 0.001 |
| **COVID-19 Diagnosis** | Present | 3,874 (0.3%) | 12,343 (0.9%) | 16,217 (0.6%) | <0.001 |
| Not Present | 1,434,409 (99.7%) | 1,392,564 (99.1%) | 2,826,973 (99.4%) |
| **Repeat Visit** | Within 48 hours | 41625 (2.9%) | 45230 (3.2%) | 86855 (3.1%) | <0.001 |
| Within 30 days | 131438 (9.1%) | 141600 (10.1%) | 273038 (9.6%) |
| No Repeat Visit | 1265220 (88%) | 1218077 (86.7%) | 2483297 (87.3%) |
| **Length of visit,**  **Hours** | <2 | 364,850 (25.4%) | 597,712 (42.5%) | 962,562 (33.9%) | <0.001 |
| 2–3 | 280,074 (19.5%) | 321,623 (22.9%) | 601,697 (21.2%) |
| 3–4 | 253,668 (17.6%) | 218,548 (15.6%) | 472,216 (16.6%) |
| 4–5 | 186,580 (13.0%) | 123,031 (8.8%) | 309,611 (10.9%) |
| 5–6 | 123,833 (8.6%) | 64,600 (4.6%) | 188,433 (6.6%) |
| >6 | 229,081 (15.9%) | 79,243 (5.6%) | 308,324 (10.8%) |
| **Diagnosis Group** | INFECTIOUS AND PARASITIC DISEASES | 8,469 (0.6%) | 16,615 (1.2%) | 25,084 (0.9%) | <0.001 |
| NEOPLASMS | 1,567 (0.1%) | 2,026 (0.1%) | 3,593 (0.1%) |
| ENDOCRINE, NUTRITIONAL AND METABOLIC DISEASES | 10,408 (0.7%) | 6,997 (0.5%) | 17,405 (0.6%) |
| DISEASES OF THE BLOOD AND BLOOD-FORMING ORGANS | 4,646 (0.3%) | 7,226 (0.5%) | 11,872 (0.4%) |
| MENTAL, BEHAVIORAL AND NEURODEVELOPMENTAL DISORDERS | 13,619 0.9%) | 24,347 (1.7%) | 37,966 (1.3%) |
| DISEASES OF THE NERVOUS SYSTEM AND SENSE ORGAN | 134,961 (9.4%) | 98,409 (7.0%) | 233,370 (8.2%) |
| DISEASES OF THE CIRCULATORY SYSTEM | 48,847 (3.4%) | 19,847 (1.4%) | 68,694 (2.4%) |
| DISEASES OF THE RESPIRATORY SYSTE | 32,913 (2.3%) | 56,733 (4.0%) | 89,646 (3.2%) |
| DISEASES OF THE DIGESTIVE SYSTEM | 48,692 (3.4%) | 60,753 (4.3%) | 109,445 (3.8%) |
| DISEASES OF THE GENITOURINARY SYSTEM | 49,911 (3.5%) | 41,469 (3.0%) | 91,380 (3.2%) |
| COMPLICATIONS OF PREGNANCY, CHILDBIRTH, AND THE PUERPERIUM | 927 (0.1%) | 500 (0.0%) | 1,427 (0.1%) |
| DISEASES OF THE SKIN AND SUBCUTANEOUS TISSUE | 19,750 (1.4%) | 57,569 (4.1%) | 77,319 (2.7%) |
| DISEASES OF THE MUSCULOSKELETAL SYSTEM AND CONNECTIVE TISSUE | 51,525 (3.6%) | 132,171 (9.4%) | 183,696 (6.5%) |
| CONGENITAL ANOMALIES | 1,368 (0.1%) | 903 (0.1%) | 2,271 (0.1%) |
| PERINATAL CONDITIONS | 4,841 (0.3%) | 191 (0.0%) | 5,032 (0.2%) |
| SYMPTOMS, SIGNS, AND ILL-DEFINED CONDITIONS | 482,868 (33.6%) | 341,147 (24.3%) | 824,015 (29.0%) |
| INJURY AND POISONING | 406,580 (28.3%) | 274,417 (19.5%) | 680,997 (24.0%) |
| EXTERNAL CAUSES OF INJURY | 52,873 (3.7%) | 94,320 (6.7%) | 147,193 (5.2%) |
| FACTORS INFLUENCING HEALTH STATUS | 44,120 (3.1%) | 122,180 (8.7%) | 166,300 (5.8%) |
| UNKNOWN DIAGNOSIS | 19,398 (1.3%) | 47,087 (3.4%) | 66,485 (2.3%) |

**Table S2**. Visit characteristics of the study population, stratified by justification of emergency department (ED) visits. Non-justified visits were significantly associated with self-referral, arrival during evening or night hours, shorter lengths of stay (especially 1–2 hours), and repeat visits within 48 hours or 30 days (p < 0.001). These visits were more frequently linked to diagnoses involving musculoskeletal complaints, skin disorders, and external causes of injury. A higher proportion of COVID-19–positive cases was also observed among non-justified visits. The columns show the number and percentage of visits in each category. P-values indicate the statistical significance of the observed differences.

## **Supplementary Table S3: Clinical Interventions Characteristics of the Study Population, by Study Group**

| **Variable** | **Group** | **Justified Visits**  **n = 1,438,283** | **Non-Justified Visits**  **n = 1,404,907** | **Total**  **n = 2,843,190** | **p-value** |
| --- | --- | --- | --- | --- | --- |
| **Laboratory Tests** | Performed | 789,112 (54.9%) | 448,311 (31.9%) | 1,237,423 (43.5%) | <0.001 |
| **Specialist Consultation** | Provided | 313,296 (21.8%) | 139,306 (9.9%) | 452,602 (15.9%) | <0.001 |
| **Medication Administration** | No Medication Administered | 856,508 (59.6%) | 915,979 (65.2%) | 1,772,487 (62.3%) | — |
| Intravenous Administration | 205,704 (14.3%) | 119,115 (8.5%) | 324,819 (11.4%) | <0.001 |
| Other Routes (Intramuscular, Subcutaneous, Per Os (oral administration)) | 376,071 (26.1%) | 369,813 (26.3%) | 745,884 (26.2%) |

**Table S3.** Clinical interventions among the study population, stratified by justification of emergency department (ED) visits. Non-justified visits were significantly less likely to involve clinical interventions, including laboratory testing (31.9% vs 54.9%), specialist consultations (9.9% vs 21.8%), and intravenous medication administration (8.5% vs 14.3%). The columns show the number and percentage of visits in each category. P-values indicate the statistical significance of the observed differences.

## **Supplementary Table S4: Financial and Institutional Characteristics of the Study Population, by Study Group**

| **Variable** | **Group** | **Justified Visits**  **n = 1,438,283** | **Non-Justified Visits**  **n = 1,404,907** | **Total**  **n = 2,843,190** | **p-value** |
| --- | --- | --- | --- | --- | --- |
| **Payer / Insurance** | Without Insurance Coverage | 10,513 (0.7%) | 12,849 (0.9%) | 23,362 (0.8%) | — |
| Israeli Defence Force / Ministry of Defense | 76,955 (5.4%) | 44,099 (3.1%) | 121,054 (4.3%) | <0.001 |
| HMO1 (Health Maintenance Organization 1) | 934,029 (64.9%) | 975,161 (69.4%) | 1,909,190 (67.1%) |
| HMO2 | 87,916 (6.1%) | 76,261 (5.4%) | 164,177 (5.8%) |
| HMO3 | 77,098 (5.4%) | 76,981 (5.5%) | 154,079 (5.4%) |
| HMO4 | 227,721 (15.8%) | 200,345 (14.3%) | 428,066 (15.1%) |
| Other / Unknown | 18,127 (1.3%) | 19,211 (1.4%) | 37,338 (1.3%) | 0.094 |
| **Total Visit Cost,**  **NIS (new Israeli shekel)** | < 400 | 267,257 (18.6%) | 450,974 (32.1%) | 718,231 (25.3%) | <0.001 |
| 400–500 | 53,596 (3.7%) | 202,852 (14.4%) | 256,448 (9.0%) |
| 500–600 | 175,088 (12.2%) | 404,242 (28.8%) | 579,330 (20.4%) |
| 600–700 | 67,861 (4.7%) | 112,219 (8.0%) | 180,080 (6.3%) |
| 700–800 | 93,703 (6.5%) | 83,518 (5.9%) | 177,221 (6.2%) |
| 800–900 | 97,942 (6.8%) | 54,038 (3.8%) | 151,980 (5.3%) |
| 900–1000 | 111,415 (7.7%) | 27,577 (2.0%) | 138,992 (4.9%) |
| >1000 | 571,421 (39.7%) | 69,487 (4.9%) | 640,908 (22.5%) |
| **Hospital** | H1 | 118,767 (8.3%) | 83,210 (5.9%) | 201,977 (7.1%) | <0.001 |
| H2 | 219,073 (15.2%) | 219,777 (15.6%) | 438,850 (15.4%) |
| H3 | 175,102 (12.2%) | 173,206 (12.3%) | 348,308 (12.3%) |
| H4 | 53,774 (3.7%) | 55,678 (4.0%) | 109,452 (3.8%) |
| H5 | 174,858 (12.2%) | 111,850 (8.0%) | 286,708 (10.1%) |
| H6 | 306,076 (21.3%) | 318,237 (22.7%) | 624,313 (22%) |
| H7 | 138,550 (9.6%) | 163,543 (11.6%) | 302,093 (10.6%) |
| H8 | 56,115 (3.9%) | 87,907 (6.3%) | 144,022 (5.1%) |
| H9 | 75,746 (5.3%) | 115,831 (8.2%) | 191,577 (6.7%) |
| H10 | 120,222 (8.4%) | 75,668 (5.4%) | 195,890 (6.9%) |
| **ED (emergency department) Type** | General | 173,330 (12.1%) | 116,455 (8.3%) | 289,784 (10.2%) | <0.001 |
| Orthopedic | 149,398 (10.4%) | 266,202 (18.9%) | 415,600 (14.6%) |
| Pediatric | 245,153 (17.0%) | 417,447 (29.7%) | 662,600 (23.3%) |
| Surgical | 188,023 (13.1%) | 194,148 (13.8%) | 379,171 (13.3%) |
| Internal Medicine | 528,511 (36.7%) | 303,601 (21.6%) | 832,112 (29.3%) |
| Ophthalmology | 129,020 (9.0%) | 51,192 (3.6%) | 180,212 (6.3%) |
| ENT and Oral & Maxillofacial | 24,848 (1.7%) | 55,862 (4.0%) | 80,710 (2.8%) |

**Table S4**. Financial and institutional characteristics of the study population, stratified by justification of emergency department (Ed) visits. Non-justified visits were significantly associated with lower visit costs: over 74% of non-justified visits cost under 600 NIS. These visits were more frequently funded by HMO1, and less often supported by institutional payers such as the IDF or hospital funds. Non-justified visits were more common in pediatric, orthopedic, ENT, and dermatology ERs, and less common in internal medicine and ophthalmology ERs. The columns show the number and percentage of visits in each category. P-values indicate the statistical significance of the observed differences.

*To protect confidentiality, the names of the health maintenance organizations and hospitals are not reported.

**Supplementary Table S5: Generalized Estimating Equation (GEE) Model Results for Prediction of Non-justified Emergency Department Visits**

| **Variable** | **Group** | **Beta** | **SE** | **OR (95% CI)** | **p-value** |
| --- | --- | --- | --- | --- | --- |
| **Age,**  **Years** | <1 | Reference |  |  |  |
| 1–4 | -0.3 | 0.012 | 0.67 [0.65, 0.69] | <0.001 |
| 5–9 | -0.58 | 0.014 | 0.56 [0.55, 0.58] | <0.001 |
| 10–14 | -0.38 | 0.015 | 0.68 [0.66, 0.70] | <0.001 |
| 15–19 | -0.35 | 0.016 | 0.70 [0.68, 0.72] | <0.001 |
| 20–24 | -0.25 | 0.017 | 0.78 [0.75, 0.80] | <0.001 |
| 25–29 | -0.28 | 0.017 | 0.76 [0.73, 0.78] | <0.001 |
| 30–34 | -0.29 | 0.017 | 0.74 [0.72, 0.77] | <0.001 |
| 35–39 | -0.35 | 0.017 | 0.71 [0.68, 0.73] | <0.001 |
| 40–44 | -0.42 | 0.017 | 0.66 [0.64, 0.68] | <0.001 |
| 45–49 | -0.42 | 0.018 | 0.66 [0.63, 0.68] | <0.001 |
| 50–54 | -0.49 | 0.018 | 0.61 [0.59, 0.64] | <0.001 |
| 55–59 | -0.51 | 0.018 | 0.60 [0.58, 0.62] | <0.001 |
| 60–64 | -0.54 | 0.018 | 0.58 [0.56, 0.60] | <0.001 |
| 65–69 | -0.58 | 0.018 | 0.56 [0.54, 0.58] | <0.001 |
| 70–74 | -0.58 | 0.018 | 0.56 [0.54, 0.58] | <0.001 |
| 75–79 | -0.55 | 0.02 | 0.58 [0.56, 0.60] | <0.001 |
| 80–84 | -0.51 | 0.02 | 0.60 [0.58, 0.63] | <0.001 |
| ≥85 | -0.49 | 0.02 | 0.61 [0.59, 0.64] | <0.001 |
| **Gender** | Female vs Male | 0.13 | 0.01 | 1.14 [1.13, 1.15] | <0.001 |
| **Referral Source** | Ambulatory Healthcare Provider | Reference |  |  |  |
| Nurse / Educational Institution | -0.29 | 0.03 | 1.16 [1.13, 1.19] | <0.001 |
| Hospital | -0.94 | 0.02 | 0.39 [0.37, 0.41] | <0.001 |
| Ambulance | -0.19 | 0.02 | 0.83 [0.80, 0.87] | <0.001 |
| Mental Health Provider | -4.15 | 0.1 | 0.02 [0.01, 0.02] | <0.001 |
| Employer | -0.09 | 0.03 | 0.91 [0.85, 0.97] | <0.001 |
| Geriatric Institution | 0.03 | 0.03 | 1.02 [0.96, 1.09] | 0.525 |
| Urgent Care Center | -0.25 | 0.05 | 0.79 [0.72, 0.87] | <0.001 |
| HMO (Health Maintenance Organization) / Health Fund | -0.12 | 0.02 | 0.90 [0.86, 0.93] | <0.001 |
| Self-Referral | -0.65 | 0.51 | 1.29 [0.78, 1.94] | 0.24 |
| Police | -0.05 | 0.06 | 0.95 [0.85, 1.06] | 0.35 |
| Unknown | -0.01 | 0.02 | 1.00 [0.97, 1.03] | 0.868 |
| **Referral Status** | Referred by Provider | Reference |  |  |  |
| Self-Referral | 0.38 | 0.61 | 1.92 [0.78, 6.87] | <0.001 |
| Unknown | -0.05 | 0.04 | 0.97 [0.92, 1.02] | 0.144 |
| **Time of Admission** | 08:00–12:00 | Reference |  |  |  |
| 12:00–16:00 | -0.03 | 0.006 | 0.97 [0.96, 0.98] | <0.001 |
| 16:00–19:00 | -0.01 | 0.006 | 0.99 [0.98, 1.00] | 0.06 |
| 19:00–23:00 | 0.01 | 0.006 | 1.01 [0.99, 1.02] | 0.341 |
| 23:00–08:00 | 0.01 | 0.007 | 1.00 [0.99, 1.02] | 0.561 |
| **Payer / Insurance** | Without Insurance Coverage | Reference |  |  |  |
| Ministry of Defence / IDF (Israeli Defence Force) | 0.32 | 0.02 | 1.38 [1.33, 1.43] | <0.001 |
| HMO1 (Health Maintenance Organization) | 0.26 | 0.01 | 1.25 [1.21, 1.29] | <0.001 |
| HMO2 | 0.11 | 0.01 | 1.14 [1.09, 1.18] | <0.001 |
| HMO3 | 0.15 | 0.02 | 1.15 [1.11, 1.19] | <0.001 |
| HMO4 | 0.07 | 0.02 | 1.07 [1.03, 1.11] | <0.001 |
| Other / Unknown | -0.03 | 0.01 | 0.97 [0.91, 1.05] | 0.779 |
| **Chief Complaint** | Medical Illness | Reference |  |  |  |
| Trauma / Injury / Accident | -0.16 | 0.01 | 0.86 [0.84, 0.87] | <0.001 |
| Other / Unknown | 0 | 0.01 | 1.00 [0.99, 1.02] | 0.679 |
| **Repeat Visit** | No | Reference |  |  |  |
| Within 48 hours | -0.03 | 0.01 | 0.97 [0.95, 1.00] | 0.057 |
| Within 30 days | -0.02 | 0.01 | 0.98 [0.97, 1.00] | 0.021 |
| **Distance to Hospital,**  **km** | <10 | Reference |  |  |  |
| 11–20 | -0.03 | 0.01 | 0.97 [0.96, 0.98] | <0.001 |
| 21–30 | -0.03 | 0.01 | 0.97 [0.96, 0.98] | <0.001 |
| 31–40 | -0.03 | 0.01 | 0.97 [0.95, 0.99] | <0.001 |
| >40 | -0.04 | 0.01 | 0.96 [0.95, 0.97] | <0.001 |
| **ED (emergency department) Type** | General | Reference | — | — | — |
| Orthopaedic | 0.6 | 0.01 | 1.82 [1.78, 1.87] | <0.001 |
| Pediatric | 0.03 | 0.02 | 1.03 [1.00, 1.06] | 0.088 |
| Surgical | 0.24 | 0.01 | 1.26 [1.23, 1.30] | <0.001 |
| Internal Medicine | -0.3 | 0.01 | 0.74 [0.73, 0.76] | <0.001 |
| Ophthalmology | -1.95 | 0.01 | 0.14 [0.14, 0.15] | <0.001 |
| ENT and Oral & Maxillofacial | 0.46 | 0.05 | 1.58 [1.44, 1.73] | <0.001 |
| **Diagnosis Group** | INFECTIOUS AND PARASITIC DISEASES | Reference |  |  |  |
| NEOPLASMS | 0.23 | 0.06 | 1.26 [1.13,1.41] | <0.001 |
| ENDOCRINE, NUTRITIONAL AND METABOLIC DISEASES | -0.55 | 0.03 | 0.58 [0.54,0.62] | <0.001 |
| DISEASES OF THE BLOOD AND BLOOD-FORMING ORGANS | -0.08 | 0.04 | 0.93 [0.86,1.00] | 0.0456 |
| MENTAL, BEHAVIORAL AND NEURODEVELOPMENTAL DISORDERS | 0.64 | 0.03 | 1.90 [1.80,2.00] | <0.001 |
| DISEASES OF THE NERVOUS SYSTEM AND SENSE ORGANS | -0.86 | 0.02 | 0.42 [0.40,0.44] | <0.001 |
| DISEASES OF THE CIRCULATORY SYSTEM | -1.33 | 0.02 | 0.26 [0.25,0.28] | <0.001 |
| DISEASES OF THE RESPIRATORY SYSTEM | 0.25 | 0.02 | 1.28 [1.22,1.35] | <0.001 |
| DISEASES OF THE DIGESTIVE SYSTEM | -0.38 | 0.02 | 0.68 [0.65,0.72] | <0.001 |
| DISEASES OF THE GENITOURINARY SYSTEM | -0.37 | 0.02 | 0.69 [0.66,0.72] | <0.001 |
| COMPLICATIONS OF PREGNANCY, CHILDBIRTH, AND THE PUERPERIUM | -2.10 | 0.09 | 0.12 [0.10,0.14] | <0.001 |
| DISEASES OF THE SKIN AND SUBCUTANEOUS TISSUE | 0.00 | 0.03 | 1.00 [0.95,1.05] | 0.9849 |
| DISEASES OF THE MUSCULOSKELETAL SYSTEM AND CONNECTIVE TISSUE | 0.57 | 0.02 | 1.77 [1.69,1.85] | <0.001 |
| CONGENITAL ANOMALIES | -2.13 | 0.07 | 0.12 [0.10,0.14] | <0.001 |
| PERINATAL CONDITIONS | -5.43 | 0.10 | 0.00 [0.00,0.01] | <0.001 |
| SYMPTOMS, SIGNS, AND ILL-DEFINED CONDITIONS | -0.45 | 0.02 | 0.64 [0.61,0.67] | <0.001 |
| INJURY AND POISONING | -1.94 | 0.02 | 0.14 [0.14,0.15] | <0.001 |
| EXTERNAL CAUSES OF INJURY | 0.06 | 0.02 | 1.06 [1.01,1.11] | 0.0118 |
| FACTORS INFLUENCING HEALTH STATUS | 0.56 | 0.02 | 1.75 [1.68,1.83] | <0.001 |
| UNKNOWN DIAGNOSIS | 0.77 | 0.02 | 2.16 [2.06,2.27] | <0.001 |
| **Length of Visit,**  **Hours** | 0–2 | Reference |  |  |  |
| 2–3 | -2.39 | 10,486.41 | 0.09 [0.00, NA] | 0.999 |
| 3–4 | -2.37 | 10,116.84 | 0.09 [0.00, NA] | 0.999 |
| 4–5 | -2.42 | 10,554.37 | 0.09 [0.00, NA] | 0.999 |
| 5–6 | -2.47 | 10,415.72 | 0.08 [0.00, NA] | 0.999 |
| >6 | -2.69 | 10,271.66 | 0.07 [0.00, NA] | 0.999 |
| **Laboratory Tests** | Yes vs No | 0.43 | 0.01 | 1.54 [1.52, 1.57] | <0.001 |
| **Specialist Consultation** | Yes vs No | -0.1 | 0.01 | 0.91 [0.89, 0.92] | <0.001 |
| **Medication Administration** | No Medication | Reference |  |  |  |
| IV Administration | 2.77 | 0.01 | 16.24 [15.95, 16.54] | <0.001 |
| Other Routes (Intramuscular, Subcutaneous, Per Os (oral administration)) | 0.72 | 0.01 | 2.07 [2.05, 2.09] | <0.001 |
| **COVID-19 Diagnosis** | Yes vs No | -0.99 | 0.03 | 0.37 [0.35, 0.39] | <0.001 |

**Table S5**. Table S5 presents the results of the multivariable logistic regression analysis using the GEE method, performed on all visits while accounting for correlated observations. The columns include the beta coefficient (Beta), standard error (SE), odds ratio (OR), 95% confidence interval (95% CI), and p-value for statistical significance. Reference groups for each variable are indicated in the first row of each category.

*For ethical and confidentiality reasons, the actual names of the HMOs have been replaced with identifiers (HMO1–HMO4).

**Model adjusted for hospital-level differences and for year-to-year variability.
